# Supplementary material
Source: Springer Nature journal article supplement (https://www.springermedizin.de/resource/supplementary/12881_2008_437_MOESM3_ESM.pdf/9450650)
Supplement: MOESM3 [file 9450650]

**Table S2**

Correlation between inflammatory markers and functional measures of disease

|                          | <i>Ln (IL-6)</i> | <i>Ln (CRP)</i> | <i>Ln (fibrinogen)</i> |
|--------------------------|------------------|-----------------|------------------------|
| Ln (IL-6)                | -                | 0.49*           | -                      |
| Ln (fibrinogen)          | 0.47*            | 0.53*           | -                      |
| BODE                     | 0.11†            | 0.06            | 0.05                   |
| MRC score                | 0.12†            | 0.08            | 0.00                   |
| FEV <sub>1</sub> %pred   | 0.01             | 0.04            | -0.05                  |
| 6MWD (meters)            | -0.30*           | -0.17*          | -0.19*                 |
| BMI (kg/m <sup>2</sup> ) | 0.07             | 0.13†           | 0.00                   |
| Maximum workload (watts) | -0.14†           | -0.10           | -0.15*                 |

† P&lt;0.05

\* P&lt;0.01
